# Supplementary material for: Highly luminescent aggregate-induced emission from polyethylene glycol-coated carbon quantum dot clusters under blue light illumination
Source: Royal Society of Chemistry journal article supplement (doi:10.1039/d0tc04007j), 2020-01-01
Supplement: d0tc04007j1.pdf [file d0tc04007j1.pdf]

### Electronic Supporting Information

For

Highly Luminescent Aggregate-Induced Emission from Polyethylene Glycol-Coated

Carbon Quantum Dot Clusters under Blue Light Illumination

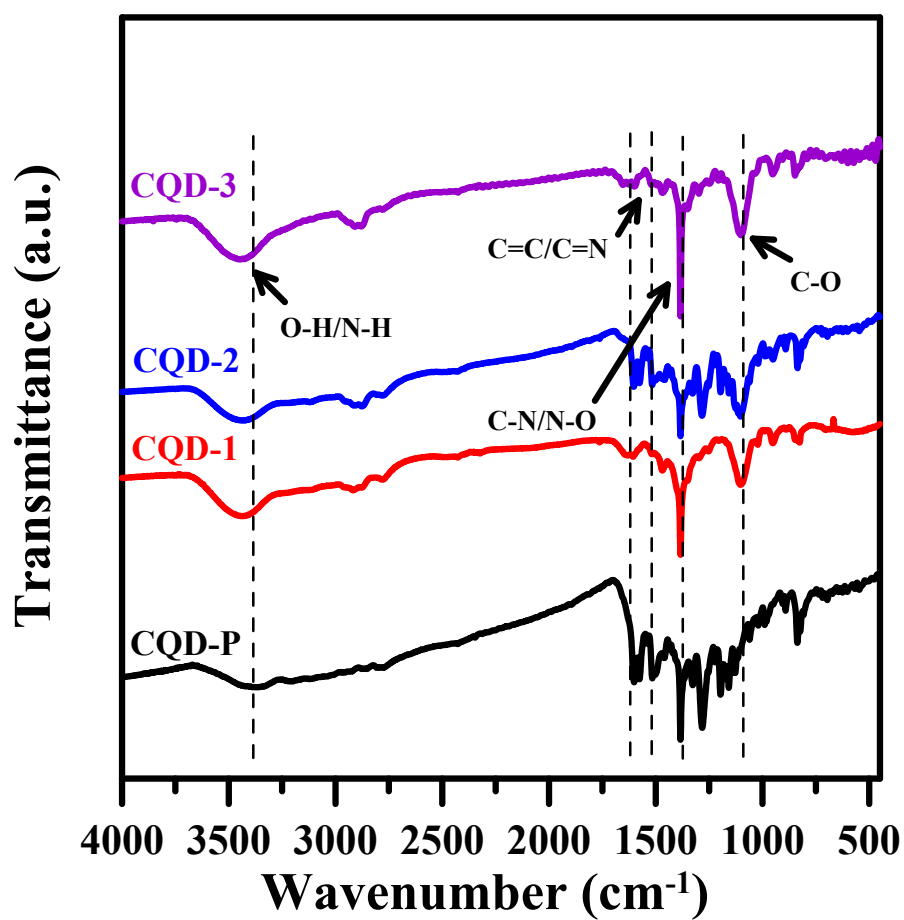

Fig. S1. FT-IR spectra of pristine and PEG-coated CQD samples.

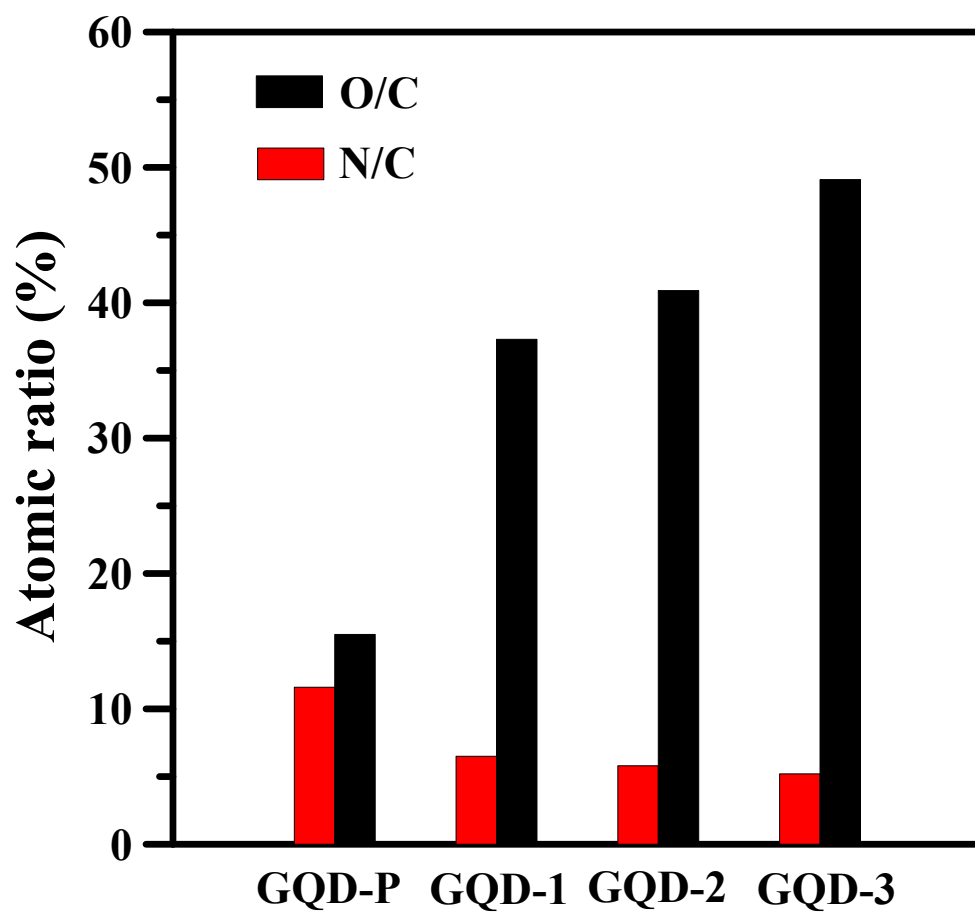

Fig. S2. Variation of O/C and N/C atomic ratio with different PEG-coated CGD clusters.

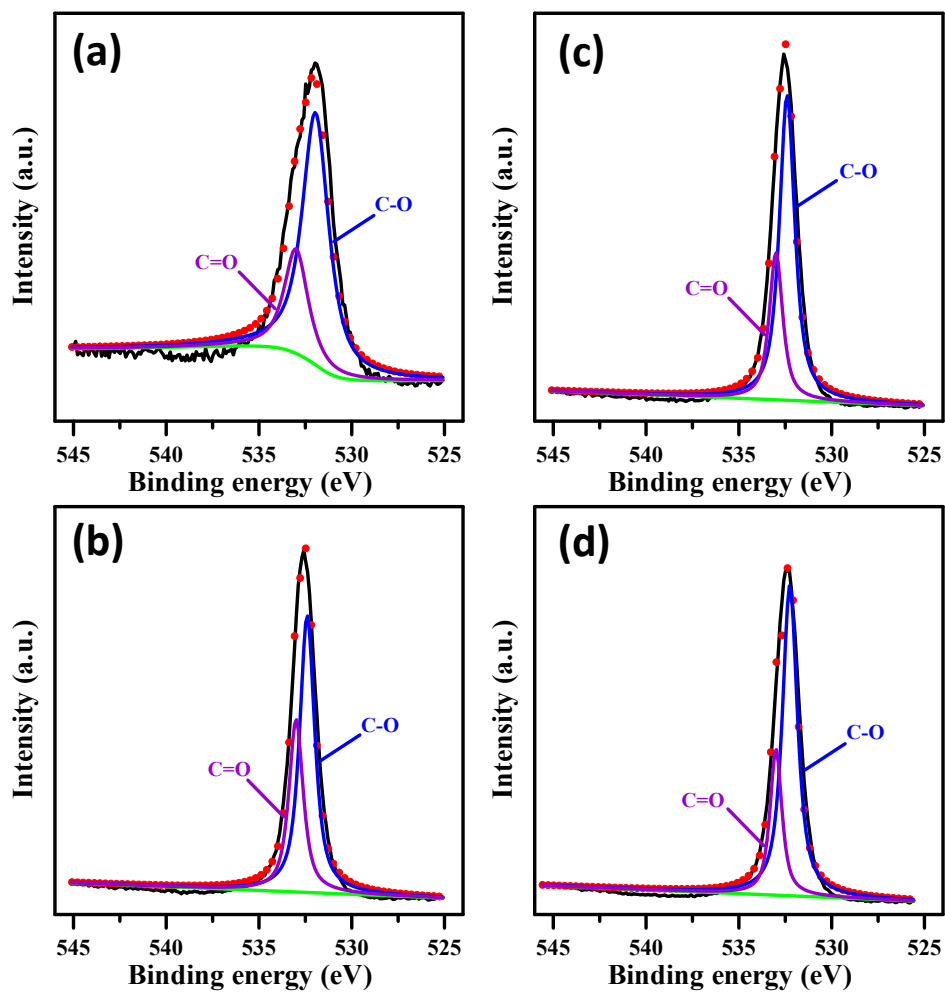

Fig. S3. XPS of O 1s peaks of different CQD samples: (a) CQD-P, (b) CQD-1, (c) CQD-2, and (d) CQD-3, deconvoluted by a multiple Gaussian function.

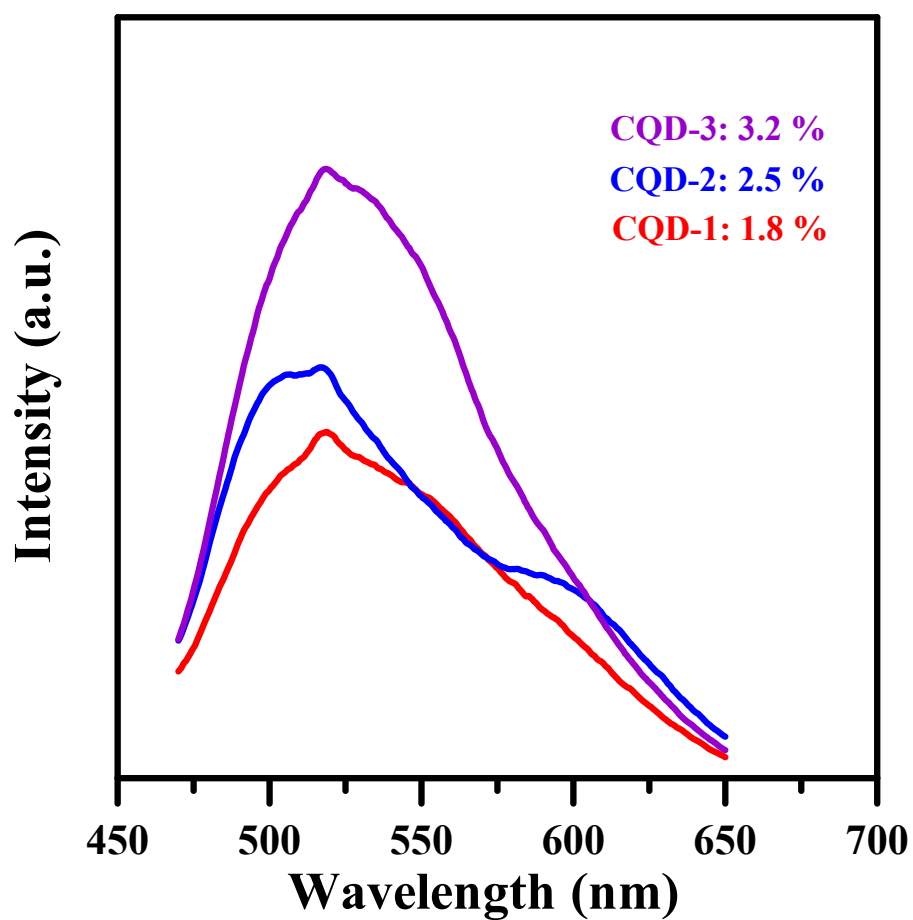

Fig. S4. PL spectra of PEG-coated CQD samples in ethanol under blue-light illumination (wavelength: 450 nm). The inset shows the QYs of PEG-coated CQD suspensions under UV illumination.
